# Supplementary material for: PIK3CA-Mutated Colorectal Cancer Exhibits a Unique Gut Dysbiosis Profile: Insights from a Nationwide Pan-Cancer Screen in Japan
Source: Research Square preprint supplement (doi:10.21203/rs.3.rs-7874624/v1), 2026-01-12
Supplement: Supplementary file 1 [file 71a072ad115e256c770067d3.xlsx]

## Sheet: Table 1
Primary lesion	F1CDx	F1LCDx or F1L	F1CDx or F1LCDx or F1L
Colon and rectum	84	221	223
Pancreas	57	221	222
Breast	68	128	132
Stomach	30	124	125
Prostate	25	104	105
Head and neck	57	102	104
Ovary, fallopian tube	53	80	82
Biliary tract	25	81	81
Renal	18	76	77
Ureters and bladder	16	63	63
Esophagus	0	42	42
Malignant melanoma	30	40	40
Liver	14	30	31
Uterine corpus	15	20	21
Uterine cervix	6	17	17
Neuroendocrine	11	16	17
Gastrointestinal stromal tumor (GIST)	0	3	3
Small intestine	0	3	3
Appendix	0	1	1
Unknown primary	0	1	1
Other	0	1	1
